# Supplementary material for: Rhomboid intramembrane protease YqgP licenses bacterial membrane protein quality control as adaptor of FtsH AAA protease
Source: PubMed Central journal article supplement (PMC7231995; doi:10.15252/embj.2019102935), 2020-01-13
Supplement: EMBJ-39-e102935-s001.pdf [file EMBJ-39-e102935-s001.pdf]

## Expanded View Figures

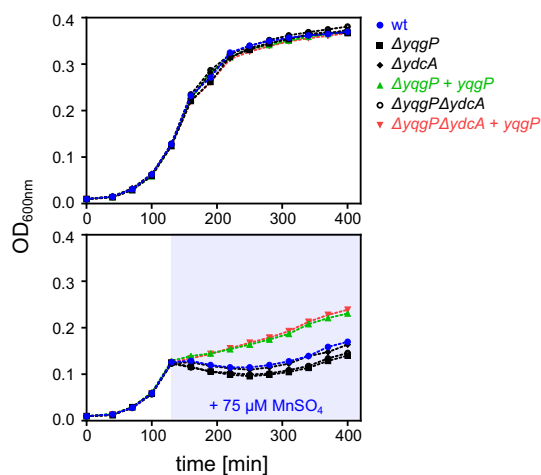

**Figure EV1. Analysis of the role of *ydcA* in the phenotypic behaviour of *Bacillus subtilis* during Mn stress.**

Growth curves of wild-type (BTM843, Table EV2), *yqgP*-deficient (BTM844, Table EV2), *ydcA*-deficient (BTM1001, Table EV2), *yqgP ydcA*-deficient (BTM1003, Table EV2) and YqgP rescue (BTM845 and BTM1005, Table EV2) strains of *B. subtilis* in M9 minimal medium with limiting magnesium (0.01 mM MgSO<sub>4</sub>), exposed to manganese stress elicited by adding 75 μM MnSO<sub>4</sub> in mid-exponential phase (stress phase denoted by blueish background, in bottom panel). All strains further contain a deletion in the putative manganese efflux pump MntP (*ΔywlD*, Table EV2). Bottom panel shows that manganese is more toxic in both *yqgP*-deficient strains (black squares or open black circles) than in the wild type or *ydcA* rhomboid-deficient strains. The overexpression of YqgP in both *ΔyqgP* and *ΔyqgPΔydcA* strains rescues fitness during manganese stress to above wild-type level. Top panel shows no difference between the strains in the absence of manganese stress.

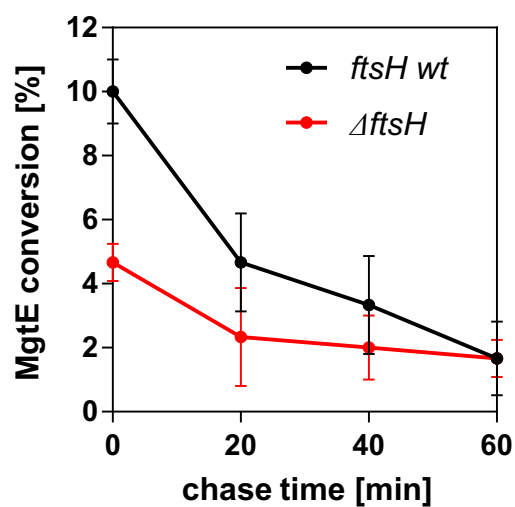

**Figure EV2. Stability of MgtE cleavage products depending on the presence of FtsH.**

Translational stop chase experiment described in Fig 7 (lanes 13–16 and lanes 37–40) was performed in four independent replicates and quantified by near-infrared Western blotting using  $\alpha$ -MgtE antibody as described in Materials and Methods. The conversion of MgtE was plotted against time as average values  $\pm$  SD, indicating that in the absence of endogenous FtsH, MgtE cleavage products are more stable.
